# Supplementary material for: Novel Ex Vivo Model to Examine the Mechanism and Relationship of Esophageal Microbiota and Disease
Source: Biomedicines. 2021 Feb 2;9(2):142. doi: 10.3390/biomedicines9020142 (PMC7912808; doi:10.3390/biomedicines9020142)
Supplement: Supplementary file 1 [file biomedicines-09-00142-s001.xlsx]

## Sheet: Sheet1
Name	Chromosome	Region
ISG15	1	1001138..1014540
PRXL2B	1	2586491..2591469
ESPN	1	6424776..6461367
ERRFI1	1	complement(8004404..8026309)
EFHD2	1	15409888..15430339
AGMAT	1	complement(15571699..15585051)
FBLIM1	1	15756607..15786594
PADI2	1	complement(17066761..17119451)
RCC2	1	complement(17406760..17439677)
AKR7L	1	complement(19265982..19274194)
PLA2G2A	1	complement(19975431..19980416)
LDLRAD2	1	21812265..21825221
HTR1D	1	complement(23191895..23194729)
CNR2	1	complement(23870515..23913362)
PAFAH2	1	complement(25959767..25998117)
SLC9A1	1	complement(27098809..27166981)
IFI6	1	complement(27666064..27672198)
DNAJC8	1	complement(28199456..28233029)
SESN2	1	28259518..28282491
RAB42	1	28592200..28595443
MEAF6	1	complement(37492575..37514774)
BMP8B	1	complement(39757182..39788865)
GUCA2B	1	42153410..42155820
GUCA2A	1	complement(42162690..42164745)
RIMKLA	1	42380792..42424232
SVBP	1	complement(42807052..42817397)
TMEM53	1	complement(44635238..44674481)
BEST4	1	complement(44783585..44788170)
TOE1	1	45340052..45343973
LURAP1	1	46203334..46221256
RAB3B	1	complement(51907956..51990700)
AL445685.3	1	complement(52020153..52033350)
USP1	1	62436297..62451804
GADD45A	1	67685201..67688334
PTGER3	1	complement(70852353..71047808)
TNNI3K	1	74235387..74544428
IFI44L	1	78619922..78646145
SAMD13	1	84298366..84389957
GBP3	1	complement(89006679..89022894)
BRDT	1	91949371..92014426
PALMD	1	99646113..99694541
SLC35A3	1	99969351..100035634
SLC30A7	1	100896076..100981757
GPSM2	1	108875350..108934545
KIAA1324	1	109113679..109206781
PSMA5	1	complement(109399042..109426448)
KCND3	1	complement(111770662..111989155)
RHOC	1	complement(112701106..112707434)
PTPN22	1	complement(113813811..113871753)
BCL2L15	1	complement(113876816..113887581)
AMPD1	1	complement(114673090..114695618)
REG4	1	complement(119794017..119811580)
NBPF20	1	complement(145289900..145405778)
NBPF10	1	complement(146064699..146229000)
FMO5	1	complement(147175351..147243050)
AC239811.1	1	complement(148607040..148679779)
MTMR11	1	complement(149928651..149936879)
SELENBP1	1	complement(151364304..151372707)
FLG	1	complement(152302175..152325203)
LCE3E	1	complement(152565654..152566772)
LCE3D	1	complement(152579381..152580516)
SPRR2F	1	complement(153112121..153113516)
PRR9	1	153217584..153219310
S100A7A	1	153416520..153423222
S100A7	1	complement(153457744..153460651)
AQP10	1	154321090..154325325
CD1E	1	158353696..158357553
IFI16	1	158999968..159055155
SLAMF7	1	160739057..160754821
ITLN1	1	complement(160876540..160885180)
FCGR2C	1	161581339..161605662
GPA33	1	complement(167052836..167166479)
F5	1	complement(169511953..169586588)
C1orf112	1	169662007..169854080
SELE	1	complement(169722640..169764705)
SUCO	1	172532349..172611833
AXDND1	1	179365720..179554735
LAMC2	1	183186238..183244900
RGS2	1	192809039..192812275
CRB1	1	197268204..197478455
LGR6	1	202193901..202319781
FMOD	1	complement(203340628..203351758)
ZBED6	1	203795714..203854999
GOLT1A	1	complement(204198163..204213988)
IL19	1	206770764..206842981
CR1	1	207496147..207641765
PROX1	1	213983181..214041502
RRP15	1	218285293..218337983
MARK1	1	220528183..220664461
CAPN8	1	complement(223538007..223665734)
TP53BP2	1	complement(223779893..223845954)
LEFTY1	1	complement(225886282..225911382)
RHOU	1	228735479..228746664
DISC1	1	231626815..232041272
GCSAML	1	247507058..247577690
LYPD8	1	complement(248739415..248755759)
CMPK2	2	complement(6840570..6866635)
ID2	2	8678845..8684461
HPCAL1	2	10302889..10427617
APOB	2	complement(21001429..21044073)
ATAD2B	2	complement(23748664..23927123)
NCOA1	2	24491914..24770702
KCNK3	2	26692690..26733420
TRIM54	2	27282392..27307439
RASGRP3	2	33436324..33564750
GALM	2	38666081..38741237
PLEKHH2	2	43637260..43767987
EPCAM	2	47345158..47387601
CNRIP1	2	complement(68284171..68320051)
ASPRV1	2	complement(69960089..69962265)
PAIP2B	2	complement(71182738..71227103)
ZNF638	2	71276561..71435069
DUSP11	2	complement(73762184..73780157)
ACTG2	2	73892314..73919865
LRRTM4	2	complement(76747719..77593319)
REG3G	2	79025686..79028505
REG3A	2	complement(79157003..79159753)
KIAA1211L	2	complement(98793846..98936259)
IL1R2	2	101991960..102028544
IL1RL1	2	102311502..102352037
FHL2	2	complement(105357712..105438513)
SULT1C2	2	108288639..108309915
ZC3H8	2	complement(112211529..112255136)
TFCP2L1	2	complement(121216587..121285202)
MYO7B	2	127535802..127637729
POTEI	2	complement(130459455..130509707)
PSMD14	2	161308425..161411717
GCA	2	162318840..162371595
NOSTRIN	2	168786539..168865514
METTL5	2	complement(169810081..169824931)
PDE1A	2	complement(182140036..182523192)
FSIP2	2	185738804..185833290
TFPI	2	complement(187464230..187565760)
C2orf88	2	189879609..190203484
CAVIN2	2	complement(191834310..191847088)
C2orf66	2	complement(196805002..196810276)
BOLL	2	complement(197726879..197786762)
PPIL3	2	complement(200870907..200889303)
CDK15	2	201790461..201895550
NRP2	2	205681990..205798133
SPAG16	2	213284379..214410501
TNS1	2	complement(217799588..218033982)
AAMP	2	complement(218264123..218270257)
VIL1	2	218419092..218453295
DES	2	219418377..219426739
SPEGNB	2	219496125..219498287
GMPPA	2	219498867..219506989
ALPG	2	232406844..232410714
SNORC	2	232857270..232878708
UGT1A9	2	233671898..233773300
MLPH	2	237485428..237555322
HES6	2	complement(238238267..238240662)
GPR35	2	240605430..240631259
GHRL	3	complement(10285675..10292947)
TAMM41	3	complement(11790442..11846919)
TIMP4	3	complement(12153068..12158912)
RAF1	3	complement(12583601..12664226)
AC090004.1	3	14135217..14148252
BTD	3	15601341..15647640
KCNH8	3	19148510..19535642
LRRFIP2	3	complement(37052626..37183689)
VILL	3	37988059..38007188
VIPR1	3	42489299..42537573
SLC6A20	3	complement(45755449..45796536)
CCDC12	3	complement(46921726..46982010)
LAMB2	3	complement(49121114..49133118)
TCTA	3	49412206..49416475
AC104452.1	3	complement(49416777..49429314)
MST1R	3	complement(49887002..49903873)
SEMA3B	3	50267558..50277546
HYAL1	3	complement(50299890..50312381)
ACY1	3	51983340..51989197
GLYCTK	3	52287089..52295257
CHDH	3	complement(53812335..53846419)
APPL1	3	57227726..57278105
CEP97	3	101724593..101770562
CD47	3	complement(108043091..108091862)
CD96	3	111292719..111665750
HGD	3	complement(120628172..120682269)
STXBP5L	3	120908072..121424761
HCLS1	3	complement(121631399..121660927)
MCM2	3	127598410..127622436
RHO	3	129528640..129535169
NME9	3	complement(138261437..138329886)
SLC9A9	3	complement(143265222..143848485)
TM4SF4	3	149473974..149503281
TSC22D2	3	150408335..150466431
SUCNR1	3	151873643..151884619
PQLC2L	3	157543246..157677749
ARL14	3	160677159..160678452
GOLIM4	3	complement(168008677..168095975)
TNFSF10	3	complement(172505508..172523475)
FXR1	3	180868141..180982753
LAMP3	3	complement(183122215..183163839)
C3orf70	3	complement(185076838..185153060)
IGF2BP2	3	complement(185643739..185825056)
SST	3	complement(187668912..187670394)
TP63	3	189631389..189897276
IL1RAP	3	190514051..190659750
FAM43A	3	194686544..194689037
CEP19	3	complement(196706277..196712250)
MFSD10	4	complement(2930561..2934834)
WFS1	4	6269849..6303265
MRFAP1L1	4	complement(6707701..6709865)
FGFBP2	4	complement(15960245..15969309)
PROM1	4	complement(15963076..16084378)
LDB2	4	complement(16501541..16898678)
GBA3	4	22692914..22819575
OCIAD2	4	complement(48885019..48906937)
LRRC66	4	complement(51993702..52017620)
CENPC	4	complement(67468762..67545503)
STAP1	4	67558727..67607337
UGT2B11	4	complement(69199951..69214731)
SULT1B1	4	complement(69721167..69787961)
SULT1E1	4	complement(69841212..69860145)
SLC4A4	4	71062667..71572087
CXCL6	4	73836640..73849064
CXCL1	4	73869393..73871242
CXCL5	4	complement(73995642..73998677)
CXCL2	4	complement(74097040..74099196)
CXCL9	4	complement(76001275..76007488)
CXCL10	4	complement(76021118..76023497)
LIN54	4	complement(82909973..83012926)
ABCG2	4	complement(88090150..88231628)
ADH6	4	complement(99202638..99219537)
MTTP	4	99563761..99623999
DAPP1	4	99816827..99870190
SLC9B1	4	complement(102885048..103019739)
UGT8	4	114598770..114678225
KIAA1109	4	122152333..122362758
HSPA4L	4	127781821..127840733
ZNF330	4	141220887..141234697
HHIP	4	144646156..144745271
OTUD4	4	complement(145110838..145180161)
SMIM31	4	164754064..164803795
PALLD	4	168497052..168928457
NEK1	4	complement(169392857..169612629)
GALNT7	4	173168811..173323967
HPGD	4	complement(174490175..174523154)
DCTD	4	complement(182890060..182917936)
ING2	4	183505058..183512429
CASP3	4	complement(184627696..184649509)
SORBS2	4	complement(185585444..185956652)
LRRC14B	5	191495..196334
SLC9A3	5	complement(470458..524332)
SLC12A7	5	complement(1050384..1112063)
SLC6A19	5	1201595..1225111
OTULINL	5	14581792..14616180
RETREG1	5	complement(16473038..16617058)
SUB1	5	32531633..32604079
DNAJC21	5	34929559..34958964
IL7R	5	35852695..35879603
DAB2	5	complement(39371675..39462300)
OXCT1	5	complement(41730065..41870425)
FST	5	53480626..53487134
PPWD1	5	65563236..65587549
SREK1	5	66139971..66183615
CCDC125	5	complement(69280175..69332809)
IQGAP2	5	76403285..76708132
F2RL2	5	complement(76615482..76623413)
TBCA	5	complement(77691166..77868780)
MTX3	5	complement(79976731..79991265)
XRCC4	5	83077498..83353787
HAPLN1	5	complement(83637805..83721613)
ADGRV1	5	90529344..91164437
TRIM36	5	complement(115124762..115180546)
TICAM2	5	complement(115578650..115602479)
SEMA6A	5	complement(116443616..116574934)
SLC22A5	5	132369752..132395614
SMIM32	5	complement(136191468..136193134)
PFDN1	5	complement(140245039..140303121)
PCDHA1	5	140786136..141012347
RNF14	5	141958328..141990292
ARHGAP26	5	142770377..143229011
CDX1	5	150166795..150184558
NMUR2	5	complement(152391532..152433368)
GALNT10	5	154190730..154420984
FAXDC2	5	complement(154818492..154859252)
SGCD	5	155870344..156767788
MED7	5	complement(157137424..157159019)
RANBP17	5	170861870..171300015
AC139491.7	5	176063748..176126959
CDHR2	5	176542511..176595974
FGFR4	5	177086905..177098144
CLK4	5	complement(178602664..178630615)
ZNF354B	5	178859953..178888122
ZFP2	5	178895898..178933212
BTNL3	5	180988845..181006727
GMPR	6	16238580..16295549
NUP153	6	complement(17615035..17706834)
TPMT	6	complement(18128311..18155077)
MBOAT1	6	complement(20102145..20212399)
DCDC2	6	complement(24171755..24358059)
SLC17A4	6	25754699..25781191
HIST1H1D	6	complement(26234268..26234933)
TRIM31	6	complement(30102897..30113090)
TRIM15	6	30163206..30172693
DHX16	6	complement(30653119..30673006)
CDSN	6	complement(31115087..31120446)
LY6G5B	6	31670167..31673776
DXO	6	complement(31969810..31972290)
PPT2-EGFL8	6	32153845..32171978
GPSM3	6	complement(32190766..32195523)
MLN	6	complement(33794673..33804003)
RPS10-NUDT3	6	complement(34284887..34426071)
SPDEF	6	complement(34537802..34556333)
SCUBE3	6	35213956..35253079
CLPS	6	complement(35794982..35797344)
RAB44	6	36697826..36733184
KCNK16	6	complement(39314698..39322968)
AL096814.1	6	42155426..42163439
KLC4	6	43040777..43075095
MEP1A	6	46793389..46839782
MTO1	6	73461578..73509236
IMPG1	6	complement(75921114..76072678)
NT5E	6	85449584..85495791
SYNCRIP	6	complement(85607785..85643792)
SMPD2	6	109440724..109443919
LAMA4	6	complement(112108757..112254939)
ASF1A	6	118894152..118909171
NCOA7	6	125781161..125932034
C6orf58	6	127519455..127591820
BCLAF1	6	complement(136256627..136289851)
ARFGEF3	6	138161939..138344663
ECT2L	6	138795926..138904070
CCDC170	6	151494017..151621193
ZDHHC14	6	157381133..157678157
SOD2_1	6	complement(159669069..159745186)
SLC22A1	6	160121815..160158718
PHF10	6	complement(169703902..169725566)
ADAP1	7	complement(897900..955407)
LFNG	7	2512529..2529177
FSCN1	7	5592816..5606655
ICA1	7	complement(8113184..8262687)
TSPAN13	7	16753755..16784536
AGR2	7	complement(16791811..16833433)
IGF2BP3	7	complement(23310209..23470491)
HOXA9	7	complement(27162438..27175180)
HOXA10	7	complement(27170592..27180261)
HOXA13	7	complement(27193503..27200091)
CPVL	7	complement(28995235..29195451)
MRPL32	7	42932376..42948958
COA1	7	complement(43608456..43729717)
PURB	7	complement(44876293..44885481)
IGFBP3	7	complement(45912245..45921874)
EGFR	7	55019017..55211628
PHKG1	7	complement(56080283..56092996)
GUSB	7	complement(65960684..65982215)
ASL	7	66075798..66093558
DNAJC30	7	complement(73680969..73683453)
CCL26	7	complement(75769533..75789896)
FGL2	7	complement(77193369..77199848)
CD36	7	80369575..80679277
SEMA3C	7	complement(80742538..80922359)
CACNA2D1	7	complement(81946444..82443777)
SEMA3A	7	complement(83955777..84492724)
SEMA3D	7	complement(84995553..85186855)
KIAA1324L	7	complement(86876906..87059654)
CROT	7	87345681..87399795
SRI	7	complement(88205118..88226993)
CFAP69	7	90245174..90311063
GTPBP10	7	90335223..90391455
CDK6	7	complement(92604921..92836594)
GNGT1	7	93591573..93911265
ASB4	7	95478444..95540233
ARPC1B	7	99374249..99394816
ZCWPW1	7	complement(100400826..100428992)
GNB2	7	100673567..100679174
MUC3A	7	100949534..100968347
MUC17	7	101020072..101058745
MOGAT3	7	complement(101195007..101201038)
PLOD3	7	complement(101205977..101218420)
CLDN15	7	complement(101232092..101238820)
RASA4	7	complement(102573807..102616757)
POLR2J2	7	complement(102665368..102671629)
SLC26A3	7	complement(107765467..107803225)
PNPLA8	7	complement(108470417..108569666)
CFTR	7	117465784..117715971
CTTNBP2	7	complement(117710651..117874139)
FLNC	7	128830377..128859274
TMEM209	7	complement(130164713..130207770)
CPA2	7	130266863..130289798
CPA4	7	130293134..130324180
CPA1	7	130380339..130388114
KIAA1549	7	complement(138831381..138981318)
PRSS1	7	142749468..142753076
PRSS2	7	142760398..142774564
KEL	7	complement(142941114..142962363)
TMEM139	7	143279957..143288048
OR6B1	7	144000320..144008793
PDIA4	7	complement(149003062..149028662)
AOC1	7	150824627..150861504
WDR86	7	complement(151375909..151410727)
NOM1	7	156949712..156973176
KBTBD11	8	1973677..2006936
DEFA5	8	complement(7055304..7056739)
DEFB4B	8	complement(7414855..7416863)
DEFB103B	8	complement(7428888..7430348)
DEFB103A	8	7881204..7882664
DEFB4A	8	7894629..7896711
SOX7	8	complement(10723768..10730511)
GATA4	8	11676959..11760002
C8orf58	8	22599599..22604150
TRIM35	8	complement(27284886..27311272)
HMBOX1	8	28890395..29064764
DUSP4	8	complement(29333064..29350684)
BAG4	8	38176533..38213301
ZMAT4	8	complement(40530590..40897833)
PLAT	8	complement(42175233..42207724)
LY96	8	73991352..74029087
TPD52	8	complement(80034745..80231232)
PAG1	8	complement(80967810..81112068)
PMP2	8	complement(81440326..81447439)
FABP4	8	complement(81478419..81483263)
RUNX1T1	8	complement(91954967..92103286)
CDH17	8	complement(94127162..94217303)
AC012213.5	8	complement(103398658..103501895)
EMC2	8	108443601..108489196
MRPL13	8	complement(120380761..120445402)
ANXA13	8	complement(123680794..123737402)
FER1L6	8	123851987..124120061
SLC45A4	8	complement(141207166..141308305)
TSNARE1	8	complement(142212080..142403182)
GSDMD	8	143553207..143563062
PPP1R16A	8	144477969..144502121
ACER2	9	19409009..19452505
MOB3B	9	complement(27325209..27529814)
C9orf72	9	complement(27546545..27573866)
SPINK4	9	33218365..33248567
ANKRD18B	9	33524394..33573009
CA9	9	35673918..35681159
ZCCHC7	9	37120539..37358149
PRUNE2	9	complement(76611376..76906114)
KIF27	9	complement(83834099..83921465)
ROR2	9	complement(91563091..91950228)
BICD2	9	complement(92711363..92764833)
FBP1	9	complement(94603133..94640249)
AOPEP	9	94726701..95087218
FOXE1	9	97853254..97856715
HEMGN	9	complement(97926791..97944856)
SMC2	9	104094260..104141419
TAL2	9	105662457..105663112
EPB41L4B	9	complement(109171975..109320964)
C9orf43	9	113410054..113429684
TRAF1	9	complement(120902393..120929173)
NEK6	9	124257606..124353307
CEL	9	133061978..133071861
GPSM1	9	136327476..136359605
MAMDC4	9	136850943..136860799
ENTPD2	9	complement(137048107..137054061)
NRARP	9	complement(137299631..137302271)
UCN3	10	5364966..5374692
TUBAL3	10	complement(5393101..5404828)
PFKFB3	10	6144934..6254644
PROSER2	10	11823339..11872277
FAM171A1	10	complement(15211643..15371289)
MLLT10	10	21524646..21743630
OTUD1	10	23439458..23442390
BAMBI	10	28677510..28682932
SVIL	10	complement(29457338..29736781)
ZNF438	10	complement(30820207..31031937)
ZNF485	10	43606419..43617904
ZFAND4	10	complement(45615501..45672780)
MSMB	10	complement(46033307..46048180)
GPRIN2	10	complement(46549044..46555530)
ZNF488	10	complement(47365496..47384293)
PARG	10	complement(49818279..49970203)
A1CF	10	complement(50799409..50885675)
PRKG1	10	50990888..52298350
IPMK	10	complement(58191517..58267894)
PBLD	10	complement(68282660..68333049)
RUFY2	10	complement(68341107..68407294)
HKDC1	10	69220332..69267552
SLC29A3	10	71319259..71381423
DNAJC9	10	complement(73183362..73248862)
MYOZ1	10	complement(73631654..73641757)
SYNPO2L	10	complement(73644881..73663803)
KCNMA1	10	complement(76869601..77638369)
NUTM2B	10	79703227..79714681
IFIT2	10	89283694..89309271
IFIT3	10	89327997..89340971
IFIT1	10	89392546..89406487
PLCE1	10	94030812..94332823
CYP2C19	10	94762681..94855547
CYP2C9	10	94938658..94990091
HOGA1	10	97584323..97612802
SEMA4G	10	100969518..100985871
LDB1	10	complement(102107560..102120453)
NEURL1	10	103493979..103592552
SMC3	10	110567691..110604636
ADRA2A	10	111077163..111080907
VWA2	10	114239254..114294489
PNLIPRP1	10	116590385..116609175
PNLIPRP2	10	116620953..116645143
PRLHR	10	complement(118589997..118595648)
GRK5	10	119207589..119459742
CUZD1	10	complement(122832158..122846175)
GPR26	10	123666355..123694607
CLRN3	10	complement(127877841..127892941)
VENTX	10	133237855..133241928
PGGHG	11	289135..296107
IFITM3	11	complement(319676..327537)
CDHR5	11	complement(616565..626078)
CRACR2B	11	826144..831991
MUC5AC	11	1157953..1201138
SLC22A18AS	11	complement(2887780..2903740)
SLC22A18	11	2899721..2925246
PHLDA2	11	complement(2928273..2929420)
HBB	11	complement(5225464..5229395)
FAM160A2	11	complement(6211335..6234711)
CAVIN3	11	complement(6318946..6320532)
RIC3	11	complement(8106056..8169055)
STK33	11	complement(8391868..8594289)
SCUBE2	11	complement(9019498..9138114)
KCNJ11	11	complement(17385859..17389331)
ABCC8	11	complement(17392498..17476879)
PRMT3	11	20387558..20509338
GAS2	11	22625509..22813055
SVIP	11	complement(22813799..22830299)
SLC5A12	11	complement(26667020..26723427)
FIBIN	11	26994184..26996121
PAX6	11	complement(31784779..31817961)
TP53I11	11	complement(44885903..44951306)
PTPRJ	11	47980558..48170841
OR8H1	11	complement(56288462..56292254)
SLC43A1	11	complement(57484534..57515780)
UBE2L6	11	complement(57551656..57568284)
SERPING1	11	57597387..57614853
MS4A2	11	60088261..60098467
MS4A1	11	60455752..60470760
PGA3	11	61203307..61213098
PGA5	11	61241042..61251448
FADS2	11	61792980..61867354
PLAAT3	11	complement(63573195..63616883)
PLCB3	11	64251523..64269150
BRMS1	11	complement(66337333..66345125)
LRFN4	11	66856647..66860475
C11orf86	11	66975277..66977004
AP003419.1	11	complement(67351572..67373584)
ACY3	11	complement(67642555..67650730)
TCIRG1	11	68039025..68050895
CHKA	11	complement(68052859..68121444)
C11orf24	11	complement(68261338..68272001)
ANAPC15	11	complement(72106378..72112780)
STARD10	11	complement(72754729..72793681)
PLEKHB1	11	73646178..73662819
KLHL35	11	complement(75422394..75430629)
PCF11	11	83156988..83187451
EED	11	86244753..86278813
RAB38	11	complement(88113251..88175443)
FUT4	11	94543840..94549898
MAML2	11	complement(95976598..96343195)
MMP1	11	complement(102789919..102798160)
POGLUT3	11	complement(108472112..108498384)
LAYN	11	111540280..111561745
TMPRSS5	11	complement(113687547..113706373)
HTR3B	11	113904677..113949078
APOA4	11	complement(116820700..116823304)
MPZL2	11	complement(118253416..118264536)
CD3E	11	118304545..118316175
CD3D	11	complement(118338954..118342744)
CD3G	11	118344344..118355161
CCDC153	11	complement(119189638..119196769)
USP2	11	complement(119355215..119381711)
GRAMD1B	11	123358428..123627774
BARX2	11	129375940..129452279
ADAMTS15	11	130448974..130476641
SLC6A12	12	complement(190077..214570)
DYRK4	12	4562204..4615302
C1S	12	6988259..7071032
C1R	12	complement(7080214..7092540)
APOBEC1	12	complement(7649400..7665908)
PHC1	12	8913896..8941467
CLEC2B	12	complement(9852984..9870136)
KLRK1	12	complement(10372353..10391874)
EPS8	12	complement(15620134..15882329)
BHLHE41	12	complement(26120030..26125037)
PTHLH	12	complement(27958084..27972705)
PUS7L	12	complement(43718993..43758817)
IRAK4	12	43758944..43789543
PCED1B	12	47079603..47236662
DNAJC22	12	49346888..49357546
GPD1	12	50103982..50111313
SMIM41	12	52079696..52108239
KRT74	12	complement(52565782..52573825)
KRT76	12	complement(52768155..52777345)
KRT8	12	complement(52897187..52949954)
KRT18	12	52948871..52952906
PRR13	12	53441678..53446645
HOXC11	12	53973126..53977643
HOXC10	12	53985065..53990279
MUCL1	12	54830518..54896008
METTL7B	12	55681678..55684611
SLC39A5	12	56230049..56237846
RBMS2	12	56521820..56596193
MYO1A	12	complement(57028517..57051198)
R3HDM2	12	complement(57253762..57431005)
METTL1	12	complement(57768471..57772119)
HMGA2	12	65824131..65966295
MYRFL	12	69825304..69959097
TSPAN8	12	complement(71125085..71441898)
TRHDE	12	72087266..72670757
NAV3	12	77324641..78213010
CCDC59	12	complement(82223681..82358805)
EEA1	12	complement(92770637..92929331)
TMCC3	12	complement(94567122..94650557)
SNRPF	12	95858928..95903828
SLC41A2	12	complement(104802553..104958744)
C12orf75	12	105235290..105396097
TMEM263	12	106955719..106978778
SSH1	12	complement(108778191..108857590)
TCTN1	12	110614027..110649430
PPP1CC	12	complement(110719680..110742939)
SH2B3	12	111405948..111451623
OAS2	12	112978395..113011723
TBX3	12	complement(114670255..114684175)
SRRM4	12	118981541..119163051
HNF1A	12	120978543..121002512
TMEM120B	12	121712752..121783001
RHOF	12	complement(121777754..121803403)
HIP1R	12	122834453..122862961
KMT5A	12	123383773..123409353
RFLNA	12	123973241..124316024
CDX2	13	complement(27962137..27971139)
VWA8	13	complement(41566835..41961120)
SLC25A30	13	complement(45393316..45418455)
HTR2A	13	complement(46831550..46897076)
MED4	13	complement(48053323..48095131)
LPAR6	13	complement(48389567..48444704)
AL162377.3	13	complement(51763951..51845159)
ATP7B	13	complement(51930436..52012125)
DACH1	13	complement(71437966..71867204)
GPR183	13	complement(99294539..99307399)
COL4A2	13	110305812..110513209
TEP1	14	complement(20365667..20413501)
RNASE2	14	20955487..20956436
TMEM253	14	21098937..21103724
OR5AU1	14	complement(21148370..21159060)
RABGGTA	14	complement(24265538..24271739)
LTB4R2	14	24305734..24312053
CTSG	14	complement(24573518..24576250)
SSTR1	14	38207904..38213067
PPM1A	14	60245752..60299087
ZBTB1	14	64503712..64533690
PPP1R36	14	64549920..64589381
PLEK2	14	complement(67386984..67412167)
TMEM229B	14	complement(67447084..67533739)
FAM161B	14	complement(73931501..73950414)
ENTPD5	14	complement(73958010..74019399)
FLVCR2	14	75578620..75663214
DIO2	14	complement(80197527..80387757)
RIN3	14	92513781..92688994
CHGA	14	92923150..92935285
ITPK1	14	complement(92936914..93116320)
IFI27L2	14	complement(94127779..94130253)
AMN	14	102922656..102933596
CKB	14	complement(103519667..103522833)
INF2	14	104689606..104722535
GPR132	14	complement(105049395..105065445)
IGHD	14	complement(105836765..105845678)
NPAP1	15	24675868..24683393
AC124312.1	15	24955034..25000276
CHRNA7	15	31923438..32173018
ZNF770	15	complement(34978341..34988287)
PHGR1	15	40351033..40356434
DISP2	15	40358219..40378621
KNSTRN	15	40382721..40394246
PPP1R14D	15	complement(40815445..40828709)
CHAC1	15	40952962..40956512
LTK	15	complement(41503637..41513887)
PLA2G4E	15	complement(41981582..42051190)
TGM5	15	complement(43232595..43266857)
GLDN	15	51341655..51408005
WDR72	15	complement(53513741..53762878)
RAB27A	15	complement(55202966..55319113)
PIGBOS1	15	complement(55317184..55319161)
DNAAF4	15	complement(55410525..55508234)
GCNT3	15	59594875..59640239
TLN2	15	62390526..62844631
TPM1	15	63042632..63071915
DAPK2	15	complement(63907036..64072033)
RBPMS2	15	complement(64739891..64775589)
SLC51B	15	65045387..65053397
CILP	15	complement(65194760..65211473)
SMAD6	15	66702236..66782849
C15orf61	15	67521131..67530146
CALML4	15	complement(68190705..68206110)
SEMA7A	15	complement(74409289..74433958)
CYP1A1	15	complement(74719542..74725536)
SCAPER	15	complement(76347904..76905444)
TSPAN3	15	complement(77041404..77083984)
STARD5	15	complement(81309053..81324183)
GOLGA6L9	15	82430018..82439153
AC245033.1	15	complement(82536788..82573194)
TM6SF1	15	83107407..83144854
FANCI	15	89243949..89317261
ARPIN-AP3S2	15	complement(89834308..89912882)
MEF2A	15	99565417..99716466
PDIA2	16	283152..287215
MCRIP2	16	636817..648474
MSLN	16	760734..768865
TPSB2	16	complement(1227272..1230184)
TPSAB1	16	1240705..1242554
C16orf91	16	complement(1419752..1420756)
GFER	16	1984193..1987749
SLC9A3R2	16	2025356..2039026
PRSS33	16	complement(2783953..2787948)
IL32	16	3065297..3082192
MTRNR2L4	16	complement(3370979..3372740)
SMIM22	16	4788397..4796491
NAGPA	16	complement(5024844..5034141)
C16orf89	16	complement(5044122..5066110)
GRIN2A	16	complement(9753404..10182754)
TEKT5	16	complement(10627501..10694945)
CPPED1	16	complement(12659799..12803887)
BFAR	16	14632931..14669236
MYH11	16	complement(15703135..15857028)
GP2	16	complement(20309572..20327808)
ANKS4B	16	21233699..21253850
AC092338.1	16	complement(22345936..22437165)
ERN2	16	complement(23690310..23713226)
CLN3	16	complement(28474111..28495575)
SULT1A2	16	complement(28591943..28597050)
SULT1A1	16	complement(28605196..28623625)
NPIPB12	16	complement(29483642..29505999)
ZG16	16	29778240..29782973
MAZ	16	29806106..29811164
PRRT2	16	29811382..29815892
AC009133.6	16	29812261..29820092
KCTD13	16	complement(29905012..29926236)
AC093512.2	16	30053090..30070420
SLX1A	16	30193887..30197561
ZNF423	16	complement(49487524..49857919)
HEATR3	16	50065970..50107272
BRD7	16	complement(50313487..50368934)
CHD9	16	53055033..53329150
RPGRIP1L	16	complement(53598153..53703938)
MT2A	16	56608584..56609497
MT1E	16	56625475..56627112
MT1H	16	56669814..56671129
CCL22	16	57358783..57366189
MMP15	16	58025754..58046901
CA7	16	66844414..66854153
CES3	16	66961245..66975149
TPPP3	16	complement(67389809..67393518)
HSD11B2	16	67430652..67437553
PARD6A	16	67660946..67662778
NRN1L	16	67884885..67888855
PRMT7	16	68310974..68358563
SMPD3	16	complement(68358327..68448508)
COG8	16	complement(69320140..69339667)
CLEC18A	16	69950705..69964452
CLEC18C	16	70173322..70187361
AC010547.4	16	complement(71447600..71489311)
MARVELD3	16	71626161..71642114
HP	16	72054592..72061055
LDHD	16	complement(75111860..75116771)
ZFP1	16	75148494..75172236
CTRB2	16	complement(75204103..75207161)
CTRB1	16	75219000..75226338
TMEM170A	16	complement(75443054..75465497)
AC009163.2	16	complement(75528532..75545428)
CHST5	16	complement(75528535..75535247)
HSD17B2	16	82035004..82098534
ATP2C2	16	84368527..84464187
ZFPM1	16	88453280..88537031
SPIRE2	16	89818179..89871319
TUBB3	16	89921392..89938761
PRDM7	16	complement(90056566..90092072)
DOC2B	17	complement(142789..181650)
RILP	17	complement(1646145..1649866)
ASPA	17	3472374..3503405
P2RX5-TAX1BP3	17	complement(3663063..3696194)
HASPIN	17	3723903..3726699
P2RX1	17	complement(3896592..3916476)
ATP2A3	17	complement(3923870..3964464)
TM4SF5	17	4771884..4783213
DNAH2	17	7717354..7833744
TMEM238L	17	complement(10794913..10804099)
TVP23C	17	complement(15502264..15563595)
LGALS9C	17	18476737..18494945
LGALS9B	17	complement(20449395..20467539)
TMEM11	17	complement(21197280..21214624)
MTRNR2L1	17	22523111..22524663
NOS2	17	complement(27756766..27800499)
TMEM97	17	28319200..28328685
VTN	17	complement(28367284..28373091)
RPL23A	17	28719985..28724359
PIPOX	17	28950513..29057216
UTP6	17	complement(31860904..31901708)
TMEM98	17	32927910..32945106
CCL15-CCL14	17	complement(35983656..36001621)
LHX1	17	36936785..36944612
TBC1D3L	17	complement(37977972..37989048)
SRCIN1	17	complement(38530031..38605952)
CWC25	17	complement(38800441..38825355)
PPP1R1B	17	39626740..39636626
GSDMB	17	complement(39904595..39919854)
IGFBP4	17	40443450..40457725
KRTAP9-4	17	41249687..41250653
KRT34	17	complement(41377650..41382403)
MYL4	17	47200446..47223679
AC003665.1	17	complement(47807372..47821834)
PRR15L	17	complement(47951967..47957883)
HOXB7	17	complement(48607227..48633572)
PRAC2	17	48723185..48724758
TTLL6	17	complement(48762235..48817214)
GIP	17	complement(48958554..48968596)
ITGA3	17	50055968..50090481
COL1A1	17	complement(50183289..50201632)
ABCC3	17	50634777..50692253
AKAP1	17	57085092..57121346
USP32	17	complement(60177327..60422470)
KCNH6	17	63523334..63548977
PRKCA	17	66302613..66810743
NOL11	17	67717931..67744531
PRKAR1A	17	68511780..68551319
KCNJ16	17	70053429..70135608
RAB37	17	74670578..74747335
HID1	17	complement(74950742..74973166)
CDR2L	17	74987632..75005800
MYO15B	17	75588058..75626849
ITGB4	17	75721328..75757818
TSPAN10	17	81637171..81648749
THOC1	18	complement(214520..268050)
PIEZO2	18	complement(10666483..11148762)
LAMA3	18	23689443..23956222
ZNF521	18	complement(25061924..25352190)
KCTD1	18	complement(26454910..26657401)
TTR	18	31557010..31599021
MAPRE2	18	34976928..35143470
RPL17-C18orf32	18	complement(49481681..49492479)
MEX3C	18	complement(51174550..51218304)
CCDC68	18	complement(54901509..54959461)
ONECUT2	18	57435374..57491298
ATP8B1	18	complement(57646426..57803315)
PMAIP1	18	59899948..59904306
TNFRSF11A	18	62325287..62391288
C18orf63	18	74315813..74359187
TPGS1	19	507497..519654
MISP	19	751112..764318
EFNA2	19	1285873..1301431
AMH	19	2249309..2252073
GNG7	19	complement(2511219..2702694)
AC006538.1	19	2785503..2815807
GNA11	19	3094362..3123999
SMIM24	19	complement(3473986..3480542)
LRG1	19	complement(4536402..4540036)
PTPRS	19	complement(5158495..5340803)
XAB2	19	complement(7619525..7629545)
CLEC4G	19	complement(7728957..7733906)
P2RY11	19	10111693..10115372
C19orf38	19	10836575..10869790
CNN1	19	11538767..11550323
AC022415.2	19	12075327..12113325
SYCE2	19	complement(12898786..12919276)
ADGRE5	19	14380501..14408725
ADGRE2	19	complement(14732392..14778560)
CASP14	19	15049480..15058293
CYP4F12	19	15672757..15697174
OR10H5	19	15787661..15801025
BST2	19	complement(17402939..17405630)
COLGALT1	19	17555649..17583162
MAST3	19	18097793..18151692
PGPEP1	19	18340598..18369950
LRRC25	19	complement(18391137..18397622)
TM6SF2	19	complement(19264364..19273391)
ZNF99	19	complement(22752183..22784151)
AC092329.3	19	complement(23222755..23274221)
ZNF302	19	34677639..34686397
FFAR2	19	35443907..35451767
CAPN12	19	complement(38730187..38769904)
LGALS4	19	complement(38801671..38812945)
CLC	19	complement(39731255..39738029)
FCGBP	19	complement(39863323..39934626)
RAB4B-EGLN2	19	40778242..40808418
LYPD4	19	complement(41837074..41844697)
CD79A	19	41877120..41881372
RABAC1	19	complement(41956681..41959321)
CD177	19	43353686..43363172
PLAUR	19	complement(43646095..43670547)
ZNF235	19	complement(44228729..44305046)
PVR	19	44643798..44666162
CBLC	19	44777869..44800652
NOVA2	19	complement(45933734..45973865)
GRIN2D	19	48394875..48444931
DBP	19	complement(48630030..48637438)
CGB7	19	complement(49054275..49058860)
TRPM4	19	49157741..49211836
FCGRT	19	49506816..49526333
RCN3	19	49528003..49546962
SIGLEC8	19	complement(51450847..51458456)
ZNF845	19	53333746..53356906
NCR1	19	54906150..54916140
TMEM86B	19	complement(55226639..55229264)
PEG3	19	complement(56810077..56840728)
ZNF543	19	57320472..57330770
CENPB	20	complement(3783851..3786740)
CDC25B	20	3786772..3806121
CHGB	20	5911510..5925353
PLCB1	20	8077251..8968360
PAK5	20	complement(9537389..9839041)
BTBD3	20	11890723..11926609
MACROD2	20	13995369..16053197
PYGB	20	25248085..25298012
TLDC2	20	36876121..36894235
FAM83D	20	38926312..38953106
HNF4A	20	44355700..44434596
ACOT8	20	complement(45841721..45857405)
ZSWIM3	20	45857614..45879122
PARD6B	20	50731580..50756795
BCAS1	20	complement(53936777..54070594)
PFDN4	20	54208087..54228052
CDH26	20	59958427..60034011
BTG3	21	complement(17593653..17612947)
TMPRSS15	21	complement(18269116..18485879)
TIAM1	21	complement(31118416..31559977)
B3GALT5	21	39556442..39673137
MX2	21	41361999..41409393
MX1	21	41420304..41459214
ABCG1	21	42199689..42297244
SIK1	21	complement(43414483..43427189)
COL6A1	21	45981737..46005050
C21orf58	21	complement(46300181..46323875)
PRMT2	21	46635595..46665124
ADA2	22	complement(17178790..17258235)
GGTLC3	22	complement(18516344..18518161)
RANBP1	22	20115938..20127355
RTN4R	22	complement(20241415..20283246)
TMEM191C	22	21466423..21471269
GGT1_1	22	24556007..24629005
PITPNB	22	complement(27851669..27920134)
TBC1D10A	22	complement(30291990..30327046)
GAL3ST1	22	complement(30554635..30574665)
SELENOM	22	complement(31104772..31120069)
APOL2	22	complement(36226209..36239954)
APOL1	22	36253010..36267530
CARD10	22	complement(37490362..37519542)
LGALS2	22	complement(37570248..37582616)
SLC16A8	22	complement(38078134..38084093)
KDELR3	22	38468078..38483447
APOBEC3B	22	38982347..38992804
PNPLA3	22	43923739..43964488
TTC38	22	46267961..46294008
IL17REL	22	complement(49994513..50012659)
TYMP	22	complement(50525752..50530032)
PLCXD1	X	276322..303356
ARSE	X	complement(2934632..2968310)
MXRA5	X	complement(3308565..3346652)
VCX3A	X	complement(6533618..6535118)
PIR	X	complement(15384799..15493564)
TXLNG	X	16786432..16844519
SH3KBP1	X	complement(19533977..19887600)
KLHL15	X	complement(23983720..24027186)
OTC	X	38352586..38421446
TIMP1	X	47582408..47586789
SSX5	X	complement(48186220..48196763)
PCSK1N	X	complement(48831096..48835610)
SYP	X	complement(49187804..49200259)
HEPH	X	66162549..66268867
TEX11	X	complement(70528940..70908731)
GJB1	X	71215194..71225215
AL133500.1	X	complement(72301691..72572843)
PBDC1	X	76172936..76178204
TCEAL7	X	103330229..103332326
RADX	X	106611930..106679439
MORC4	X	complement(106813871..107000212)
CLDN2	X	106900164..106930861
VSIG1	X	108044970..108079184
TMEM164	X	110002631..110182734
CAPN6	X	complement(111245099..111270483)
CT83	X	complement(116461686..116462976)
DAZ2	Y	23219434..23291356
MT-CO1	MT	5904..7445
MT-CO2	MT	7586..8269
